# Supplementary material
Source: PubMed Central journal article supplement (PMC8267845)
Supplement: jamaoncol-e212086-s003.pdf [file jamaoncol-e212086-s003.pdf]

## Data Sharing Statement

Wagner. Association of Combination of Conformation-Specific KIT Inhibitors With Clinical Benefit in Patients with Refractory Gastrointestinal Stromal Tumors. *JAMA Oncol.* Published July 08, 2021. doi:10.1001/jamaoncol.2021.2086

### Data

**Data available:** Yes

**Data types:** Deidentified participant data

**How to access data:** all request should be addressed to [JTrent@med.miami.edu](mailto:JTrent@med.miami.edu)

**When available:** With publication

### Supporting Documents

**Document types:** None

### Additional Information

**Who can access the data:** researchers whose proposed use of the data has been approved

**Types of analyses:** for any purpose

**Mechanisms of data availability:** with investigator support
